# Supplementary material
Source: publisher site journal article supplement (https://content.cld.iop.org/journals/2632-959X/1/2/020030/revision4/nanoxabae22supp1.pdf)
Supplement: Supplementary file 1 [file nanoxabae22supp1.pdf]

# Supporting Information

## Low Cycles Pulsed Chemical Vapor Deposition of Polycrystalline Anatase TiO<sub>2</sub>

Morgan Humphreys<sup>1</sup>, and Giancarlo Corti<sup>1</sup>†

<sup>1</sup> Department of Mechanical and Manufacturing Engineering, Miami University, Oxford OH, USA

E-mail: corticlg@miamioh.edu

July 2020

Submitted to: *Nano Express*

Coated and uncoated samples with polycrystalline anatase TiO<sub>2</sub> composition was analyzed by X-ray energy dispersive spectroscopy (XEDS) within the Zeiss Supra 35 microscope. These spectra were collected using an accelerating voltage of 15 keV and were collected over a span of 300 live seconds with at 3500 count per second.

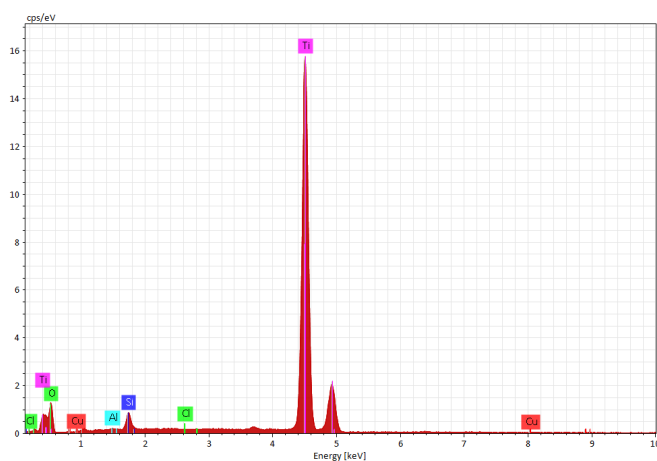

**Figure 1.** XEDS spectrum collected from the sandblasted titanium substrate.

† To whom correspondence should be addressed.

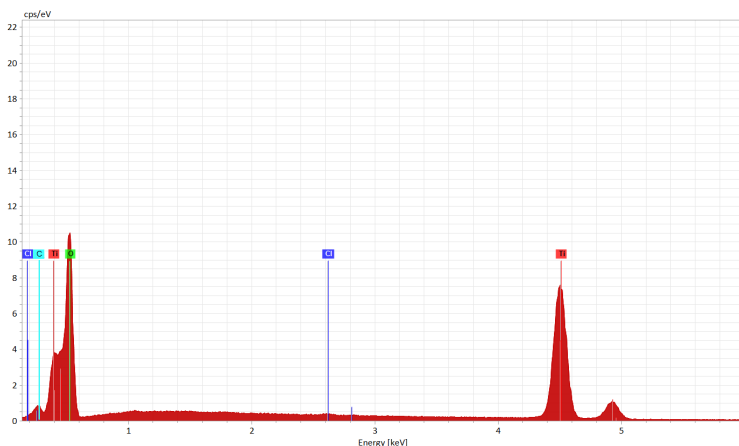

**Figure 2.** XEDS spectrum collected from the 30 cycle polycrystalline  $\text{TiO}_2$ .

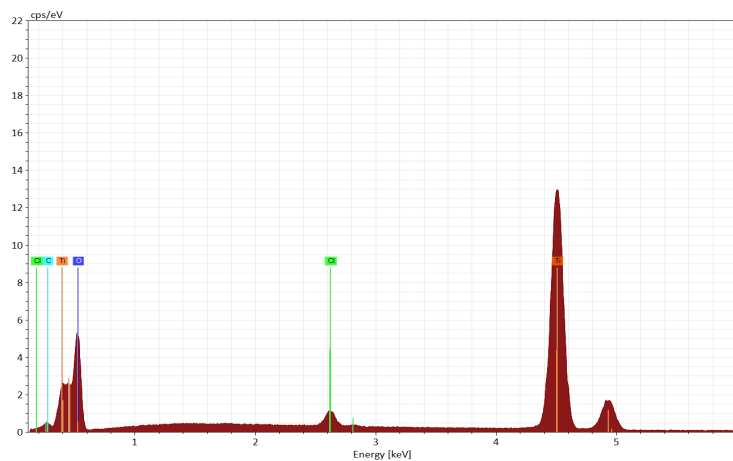

**Figure 3.** XEDS spectrum collected from the 60 cycle polycrystalline  $\text{TiO}_2$ .

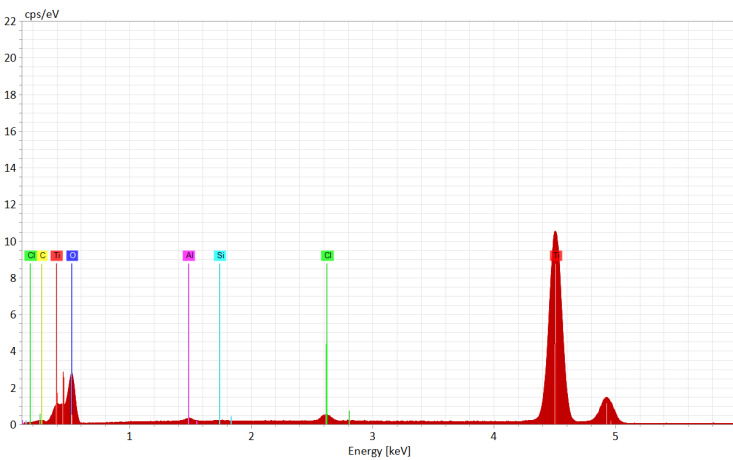

**Figure 4.** XEDS spectrum collected from the Al substrate coated with 60 cycle polycrystalline  $\text{TiO}_2$ .
